# Supplementary material for: Natural polyphenols as sirtuin 6 modulators
Source: PubMed Central journal article supplement (PMC5841289; doi:10.1038/s41598-018-22388-5), 2018-03-07
Supplement: 41598_2018_22388_MOESM1_ESM.pdf [file 41598_2018_22388_MOESM1_ESM.pdf]

## **Natural polyphenols as sirtuin 6 modulators**

Minna Rahnasto-Rilla,<sup>1,2,+</sup> Jonna Tyni,<sup>2,+</sup> Marjo Huovinen<sup>2</sup>, Elina Jarho<sup>2</sup>, Tomasz Kulikowicz<sup>1</sup>, Sarangan Ravichandran<sup>3</sup>, Vilhelm A. Bohr<sup>1</sup>, Luigi Ferrucci<sup>1</sup>, Maija Lahtela-Kakkonen,<sup>\*,2</sup> and Ruin Moaddel<sup>\*,1</sup>

<sup>1</sup>Biomedical Research Center, National Institute on Aging, National Institutes of Health, Baltimore, Maryland 21224,

USA

<sup>2</sup>School of Pharmacy, University of Eastern Finland, P.O.Box 1627, 70210, Kuopio, Finland

<sup>3</sup>Advanced Biomedical Computing Center, Frederick National Laboratory for Cancer Research, Leidos Biomedical Research Inc., Fredrick, Maryland 21701, USA

\*[maija.lahtela-kakkonen@uef.fi](mailto:maija.lahtela-kakkonen@uef.fi); [Moaddelru@grc.nia.nih.gov](mailto:Moaddelru@grc.nia.nih.gov)

<sup>+</sup>these authors contributed equally to this work

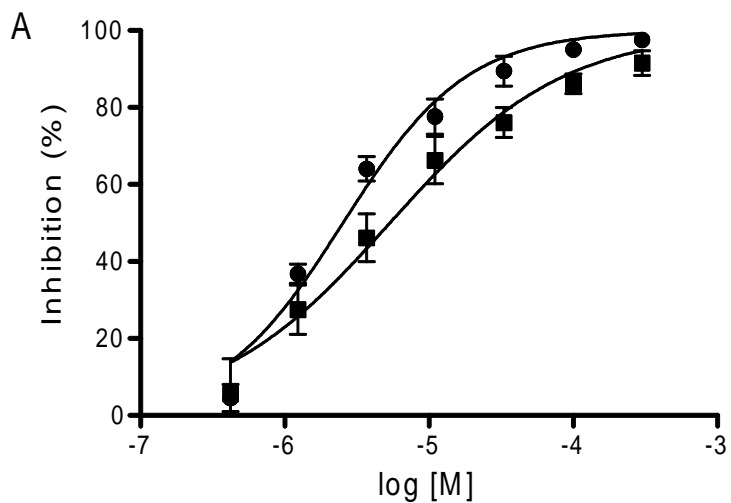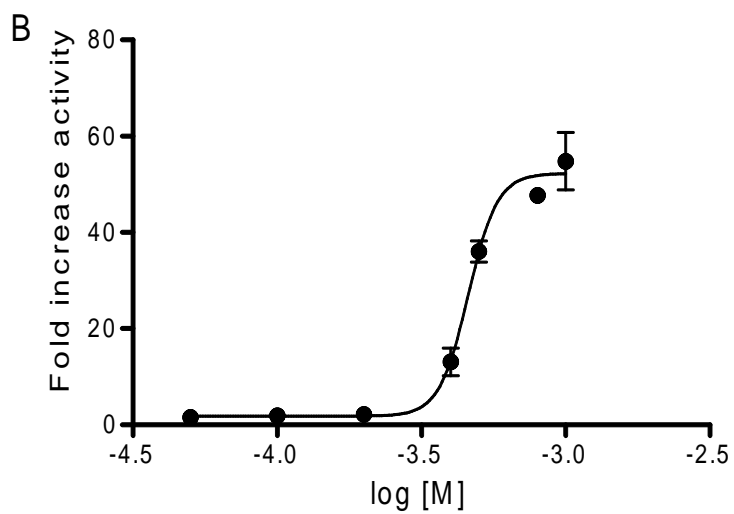

**Figure S1.** The  $IC_{50}$  curves for compounds **4** (●) and **5** (■) (A), and  $EC_{50}$  curve for compound **17** (B) with the standard deviation of the different measurements,  $n=3$ .

**Table S1.** SIRT6 activity data of flavonoids. The data is presented as means  $\pm$  SD, n=3.

|                                                                                     |                              | Inhibition %     |              | Activation     |               |              |                 |
|-------------------------------------------------------------------------------------|------------------------------|------------------|--------------|----------------|---------------|--------------|-----------------|
|                                                                                     |                              | 100 $\mu$ M      | 10 $\mu$ M   | 100 $\mu$ M    |               |              |                 |
| 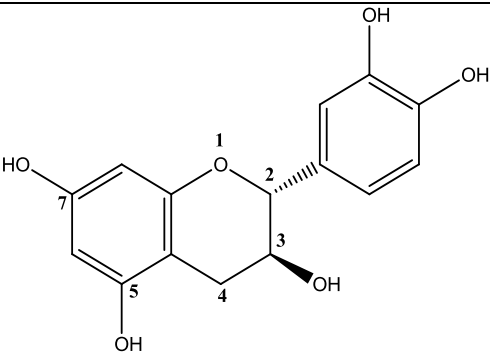   |                              |                  |              |                |               |              |                 |
| <b>1</b>                                                                            | (+)-Catechin                 | 26 $\pm$ 1.3     | 17 $\pm$ 1.6 | 0.8 $\pm$ 0.02 |               |              |                 |
|   |                              |                  |              |                |               |              |                 |
| <b>2</b>                                                                            | (-)-Catechin                 | OH               | OH           | H              | 54 $\pm$ 0.5  | 25 $\pm$ 0.8 | 0.4 $\pm$ 0.04  |
| <b>3</b>                                                                            | (-)-Gallocatechin            | OH               | OH           | OH             | 23 $\pm$ 1.0  | 17 $\pm$ 0.8 | 0.2 $\pm$ 0.01  |
| <b>4</b>                                                                            | (-)-Catechin gallate         | gal <sup>a</sup> | OH           | H              | 88 $\pm$ 0.2  | 62 $\pm$ 0.7 | 0.1 $\pm$ 0.03  |
| <b>5</b>                                                                            | (-)-Gallocatechin gallate    | gal <sup>a</sup> | OH           | OH             | 84 $\pm$ 0.6  | 79 $\pm$ 0.5 | 0.01 $\pm$ 0.01 |
|  |                              |                  |              |                |               |              |                 |
| <b>6</b>                                                                            | (-)-Epicatechin              | OH               | OH           | H              | 10 $\pm$ 0.1  | nd           | nd              |
| <b>7</b>                                                                            | (-)-Epigallocatechin         | OH               | OH           | OH             | 4.1 $\pm$ 0.1 | nd           | nd              |
| <b>8</b>                                                                            | (-)-Epicatechin gallate      | gal <sup>a</sup> | OH           | H              | 60 $\pm$ 3.6  | 15 $\pm$ 0.9 | 0.1 $\pm$ 0.01  |
| <b>9</b>                                                                            | (-)-Epigallocatechin gallate | gal <sup>a</sup> | OH           | OH             | 42 $\pm$ 1.9  | 10 $\pm$ 1.4 | 0.8 $\pm$ 0.04  |

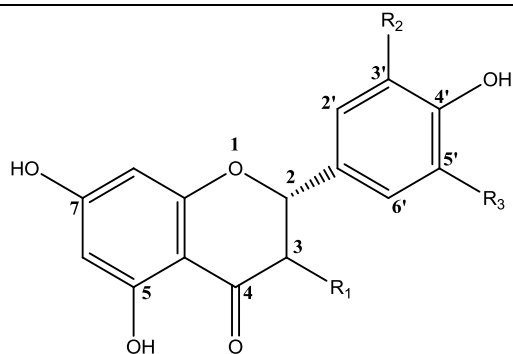

**10** Naringenin

**11** Eriodictoyl

| <b>R<sub>1</sub></b> | <b>R<sub>2</sub></b> | <b>R<sub>3</sub></b> |          |           |            |
|----------------------|----------------------|----------------------|----------|-----------|------------|
| H                    | H                    | H                    | 23 ± 1.5 | 8.3 ± 1.1 | 1.1 ± 0.05 |
| H                    | OH                   | H                    | 27 ± 1.5 | 19 ± 2.2  | 1.1 0.2    |

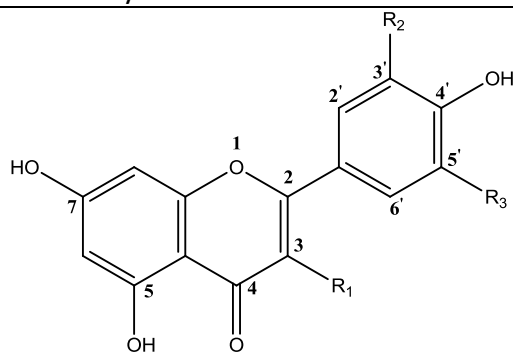

**12** Apigenin

**13** Luteolin

**14** Kaempferol

**15** Quercetin

**16** Myricetin

| <b>R<sub>1</sub></b> | <b>R<sub>2</sub></b> | <b>R<sub>3</sub></b> |           |          |            |
|----------------------|----------------------|----------------------|-----------|----------|------------|
| H                    | H                    | H                    | 1.0 ± 0.6 | nd       | 0.9 ± 0.01 |
| H                    | OH                   | H                    | 29 ± 0.3  | 24 ± 1.8 | 1.2 ± 0.04 |
| OH                   | H                    | H                    | 24 ± 1.7  | 40 ± 0.8 | 2.2 ± 0.1  |
| OH                   | OH                   | H                    | 40 ± 3.0  | 27 ± 0.4 | 1.5 ± 0.1  |
| OH                   | OH                   | OH                   | 0         | nd       | 2.3 ± 0.2  |

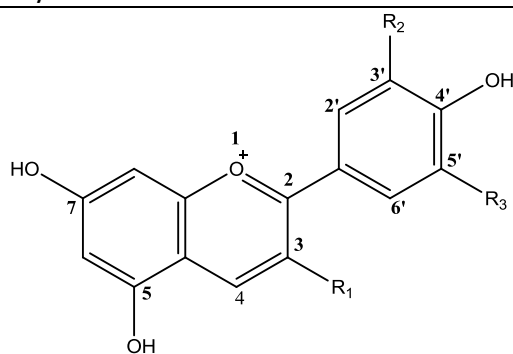

**17** Cyanidin

**18** Delphinidin

| <b>R<sub>1</sub></b> | <b>R<sub>2</sub></b> | <b>R<sub>3</sub></b> |   |    |           |
|----------------------|----------------------|----------------------|---|----|-----------|
| OH                   | OH                   | H                    | 0 | nd | 2.6 ± 0.1 |
| OH                   | OH                   | OH                   | 0 | nd | 2.2 ± 0.1 |

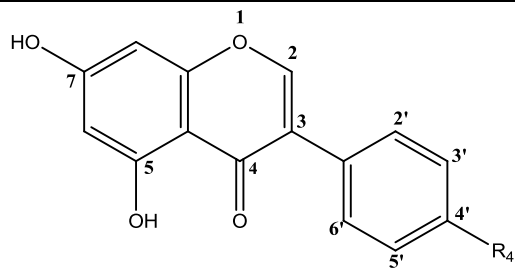

|           |             | <b>R<sub>4</sub></b> |           |           |            |
|-----------|-------------|----------------------|-----------|-----------|------------|
| <b>19</b> | Genistein   | OH                   | 9.6 ± 1.4 | 1.8 ± 0.3 | 0.7 ± 0.2  |
| <b>20</b> | Biochanin A | OCH <sub>3</sub>     | 24 ± 0.9  | 13 ± 0.5  | 1.3 ± 0.02 |

**Table S2.** SIRT6 activity data of phenolic acids. The data is presented as means ± SD, n=3.

| <b>Compound</b>                                           | <b>Inhibition %<br/>100 μM</b> | <b>Activation<br/>100 μM</b> |
|-----------------------------------------------------------|--------------------------------|------------------------------|
| <br><b>21</b> Nicotinamide                                | 58 ± 1.3 <sup>a</sup>          | nd                           |
| <br><b>22</b> Gallic Acid                                 | 14 ± 1.2                       | 1.4 ± 0.04                   |
| <br><b>23</b> 3-(4-Hydroxy-3-methoxyphenyl)propionic acid | -12 ± 1.1                      | 1.8 ± 0.05                   |

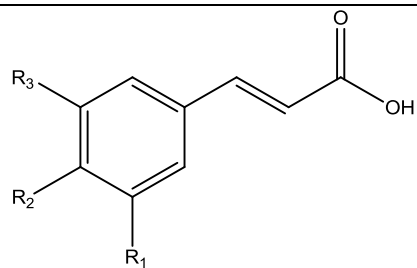

|           | <b>R<sub>1</sub></b> | <b>R<sub>2</sub></b> | <b>R<sub>3</sub></b> |                  |            |            |
|-----------|----------------------|----------------------|----------------------|------------------|------------|------------|
| <b>24</b> | p-Coumaric acid      | H                    | OH                   | H                | 8.5 ± 1.2  | 0.6 ± 0.1  |
| <b>25</b> | Caffeic Acid         | OH                   | OH                   | H                | -5.9 ± 0.2 | 1.0 ± 0.01 |
| <b>26</b> | trans-Ferulic acid   | OCH <sub>3</sub>     | OH                   | H                | -8.6 ± 0.3 | 0.9 ± 0.6  |
| <b>27</b> | Sinapic Acid         | OCH <sub>3</sub>     | OH                   | OCH <sub>3</sub> | 8.0 ± 0.9  | 0.6 ± 0.2  |

<sup>a</sup> 1000 μM concentration

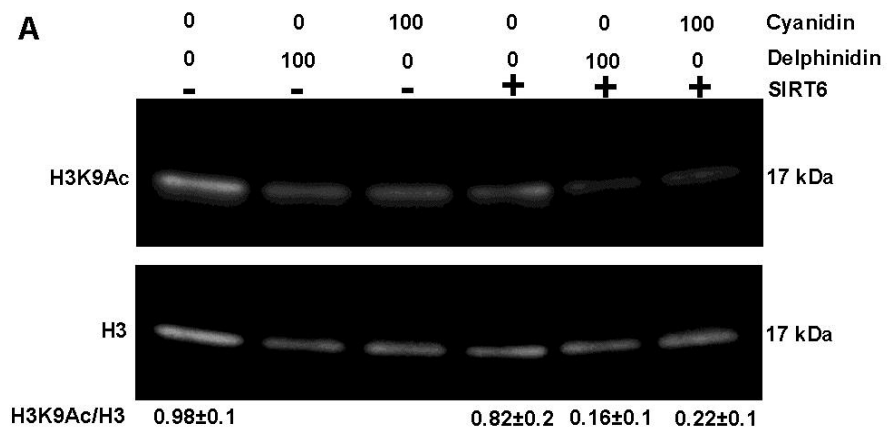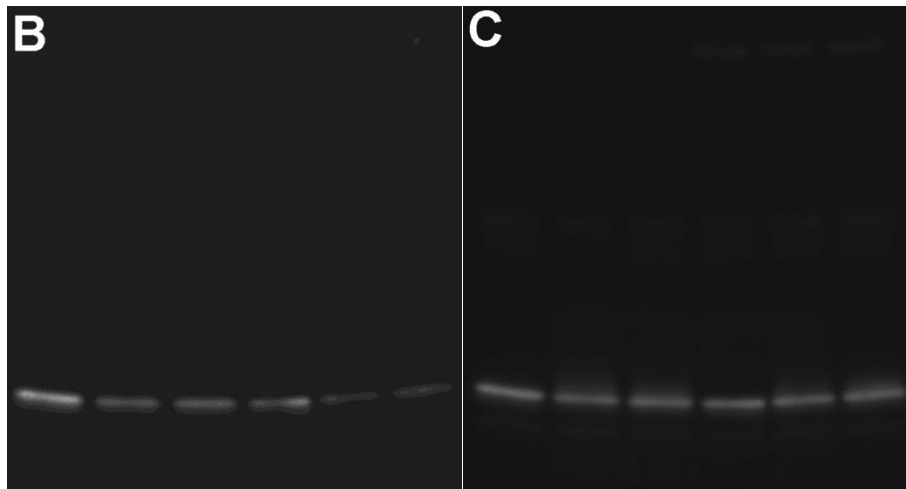

**Figure S2.** Immunoblotting analysis of H3K9 at the concentration of 100  $\mu$ M delphinidin and cyanidin, 3  $\mu$ g/well of a purified recombinant GST-SIRT6 protein, 1.25  $\mu$ g purified whole chicken core histones with 500  $\mu$ M  $\text{NAD}^+$  in 25 mM Tris-HCl, pH 8.0. Analysis were repeated three times and one representative cropped blot is shown (A). Uncropped blots probed with H3K9Ac (B), H3 (C).

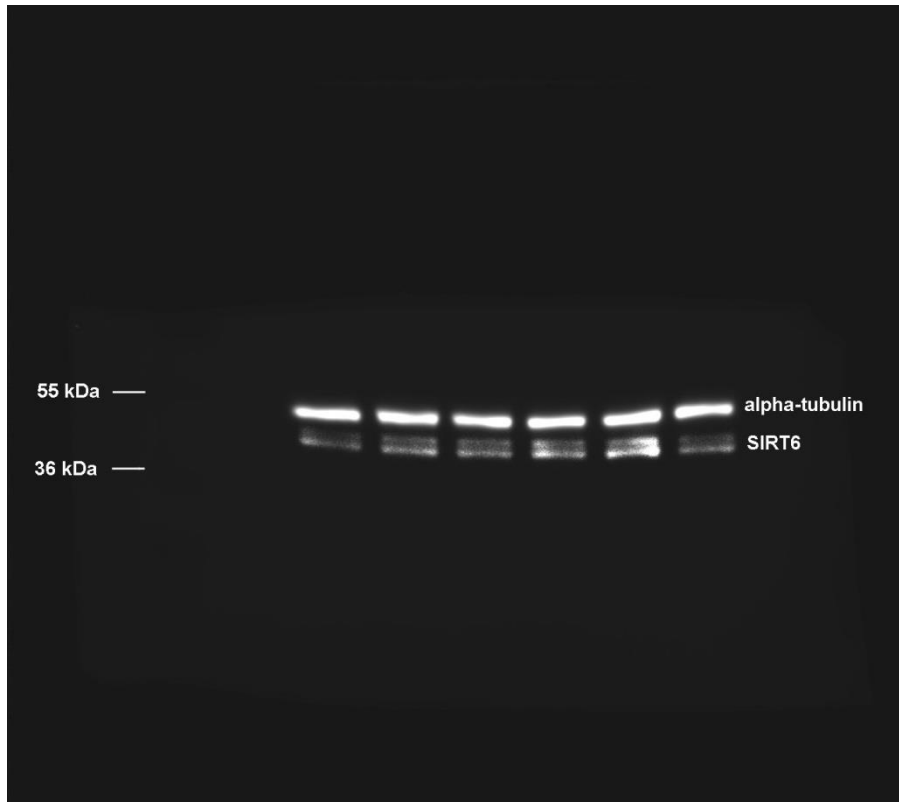

**Figure S3.** Uncropped blots probed with SIRT6 and  $\alpha$ -tubulin in Figure 3B.



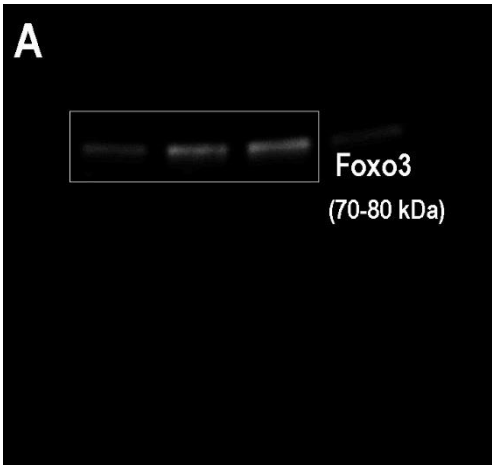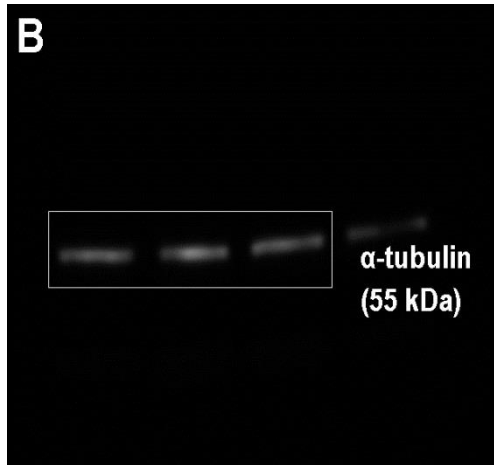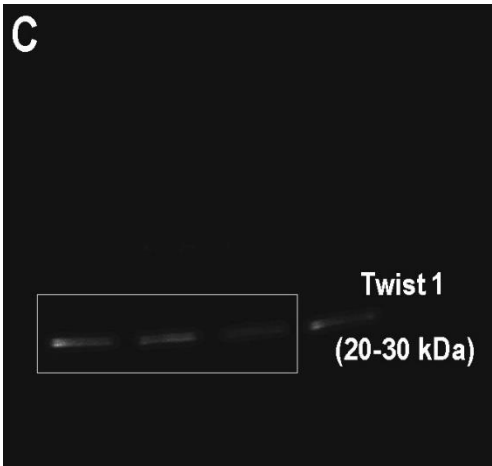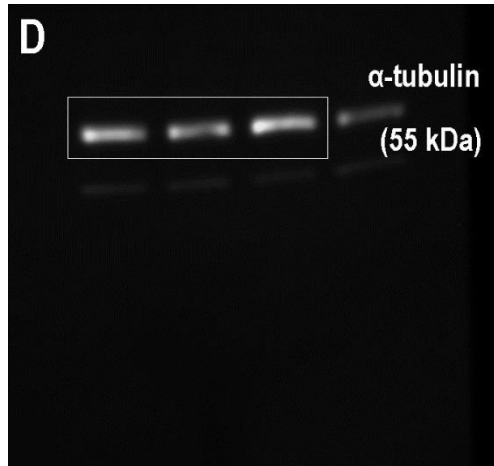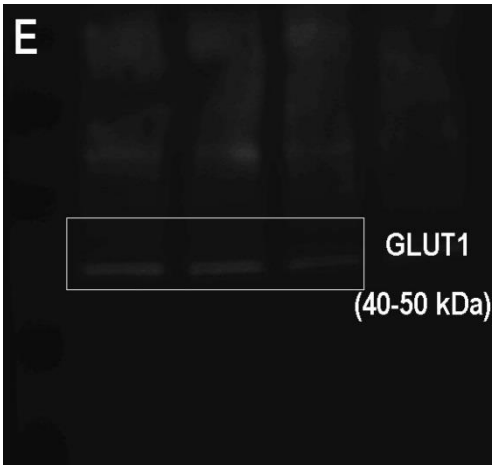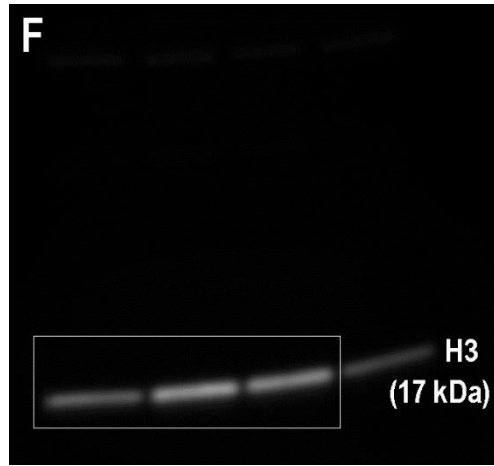

**Figure S4.** Full blot images for Figure 4 with approximate regions used for figures marked with rectangles.

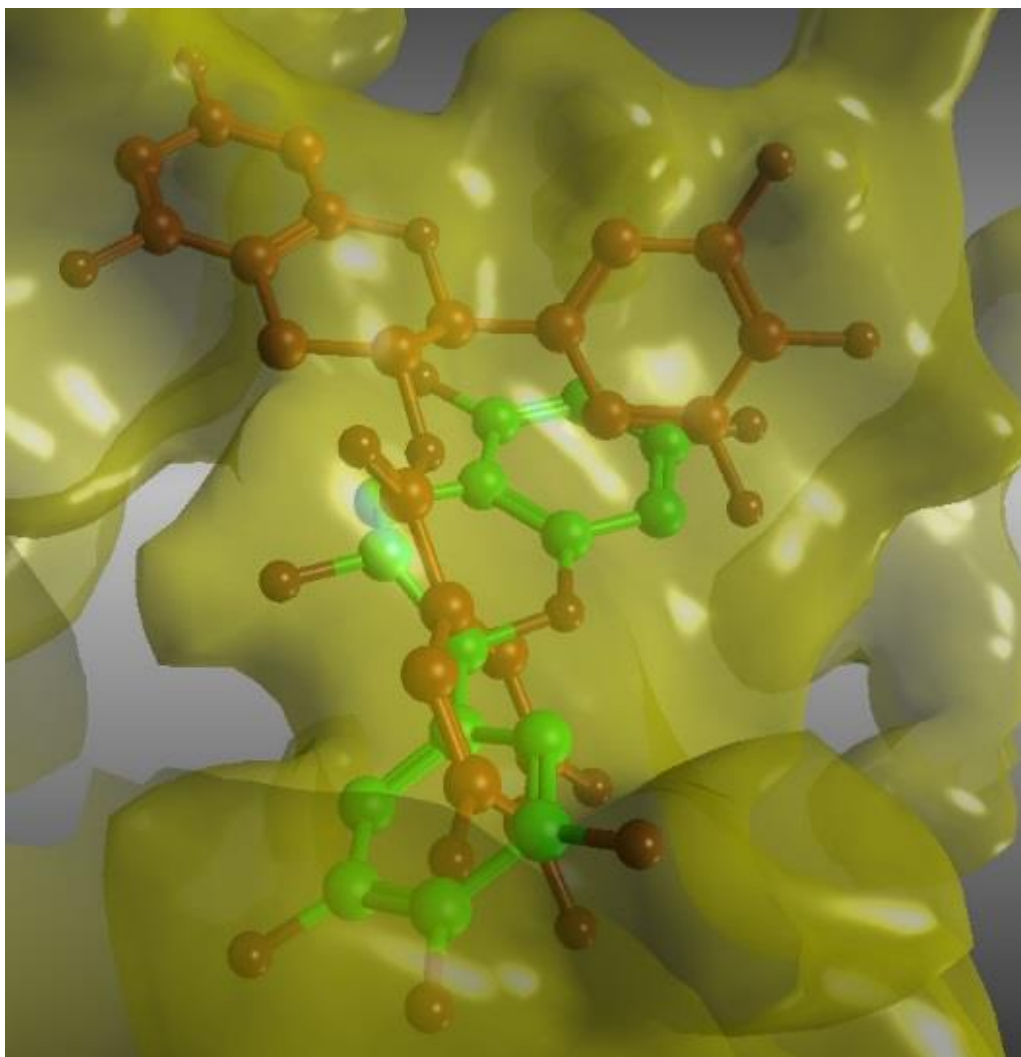

**Figure S5.** The complementary filling of compound **3** (green) and **5** (brown) in the inhibitor binding pocket of SIRT6. The yellow surface represents the inhibitor binding pocket.

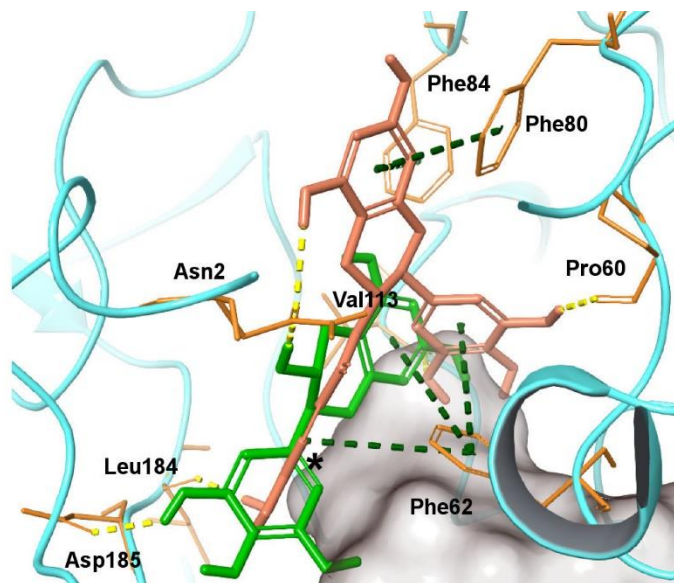

**Figure S6.** Aligned docking poses of compounds **3** (green) and **5** (brown) at SIRT6 inhibitor site. Yellow dashes indicate hydrogen bonding and green dashes indicate  $\pi$ - $\pi$  stacking to different amino acids (orange). Grey area represents  $\text{NAD}^+$  binding pocket. Gallate-moiety of compound **5** is marked with \*. For 2D interaction diagrams of compounds **3** and **5**, see Suppl. Fig. S11.

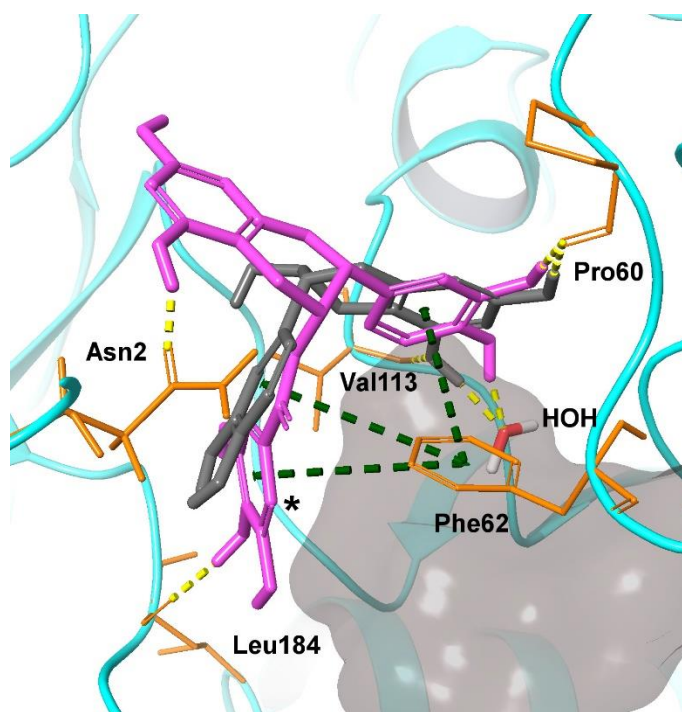

**Figure S7.** Aligned docking poses of compounds **6** (dark grey) and **8** (magenta) at SIRT6 inhibitor site. Yellow dashes indicate hydrogen bonding and green dashes indicate  $\pi$ - $\pi$  stacking to different amino acids (orange). Grey area represents  $\text{NAD}^+$  binding pocket. Gallate-moiety of compound **6** is marked with \*. For 2D interaction diagrams of compounds **6** and **8**, see Suppl. Fig. S12.

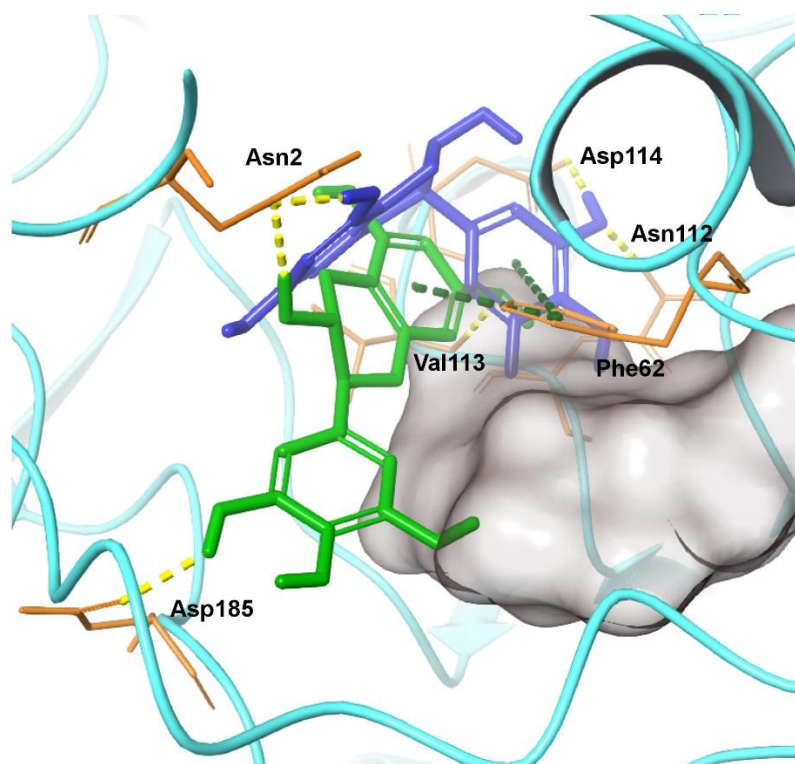

**Figure S8.** Aligned docking poses of compounds **3** (green) and **7** (blue) at SIRT6 inhibitor binding site. Yellow dashes indicate hydrogen bonding and green dashes indicate  $\pi$ - $\pi$  stacking to different amino acids (orange). Grey area represents NAD<sup>+</sup> binding pocket. For 2D interaction diagram of compounds **3** and **7**, see Suppl. Fig. S11 and S12, respectively.

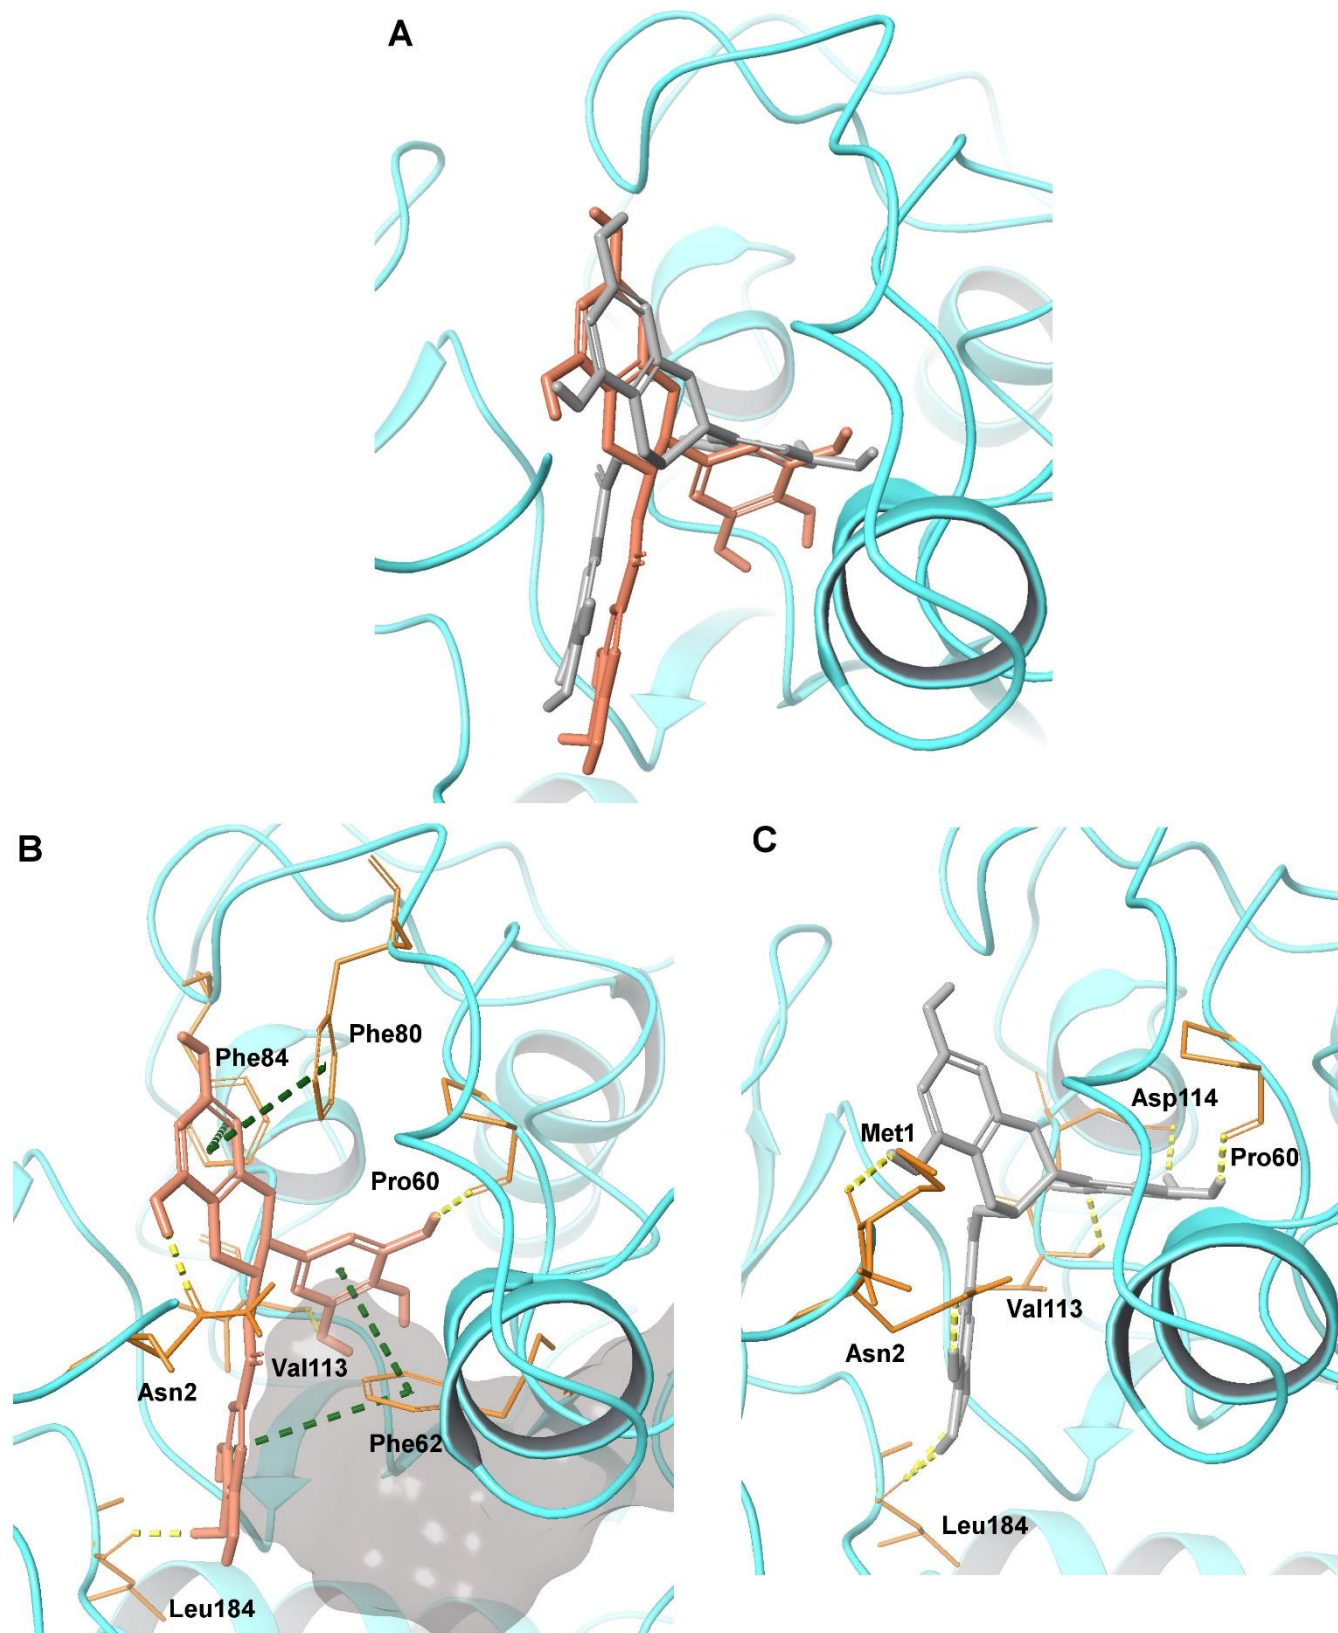

**Figure S9.** Aligned docking poses of compounds **5** and **9** at SIRT6 inhibitor binding site (A). Docking poses and interactions of compounds **5** (brown) (B) and **9** (grey) (C). Yellow dashes indicate hydrogen bonding and green dashes indicate  $\pi$ - $\pi$  stacking to different amino acids (orange). Grey area represents  $\text{NAD}^+$  binding pocket. For 2D interaction diagrams of compounds **5** and **9**, see Suppl. Fig. S11 and S12, respectively.



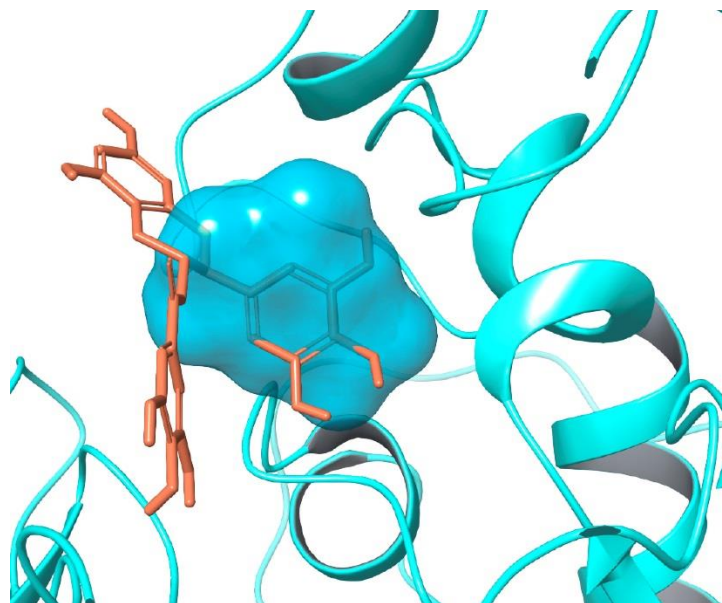

**Figure S10.** The location of the binding site (blue area) of phenolic acids at the inhibitor binding pocket compared to the binding area of inhibitor, compound **5** (brown).

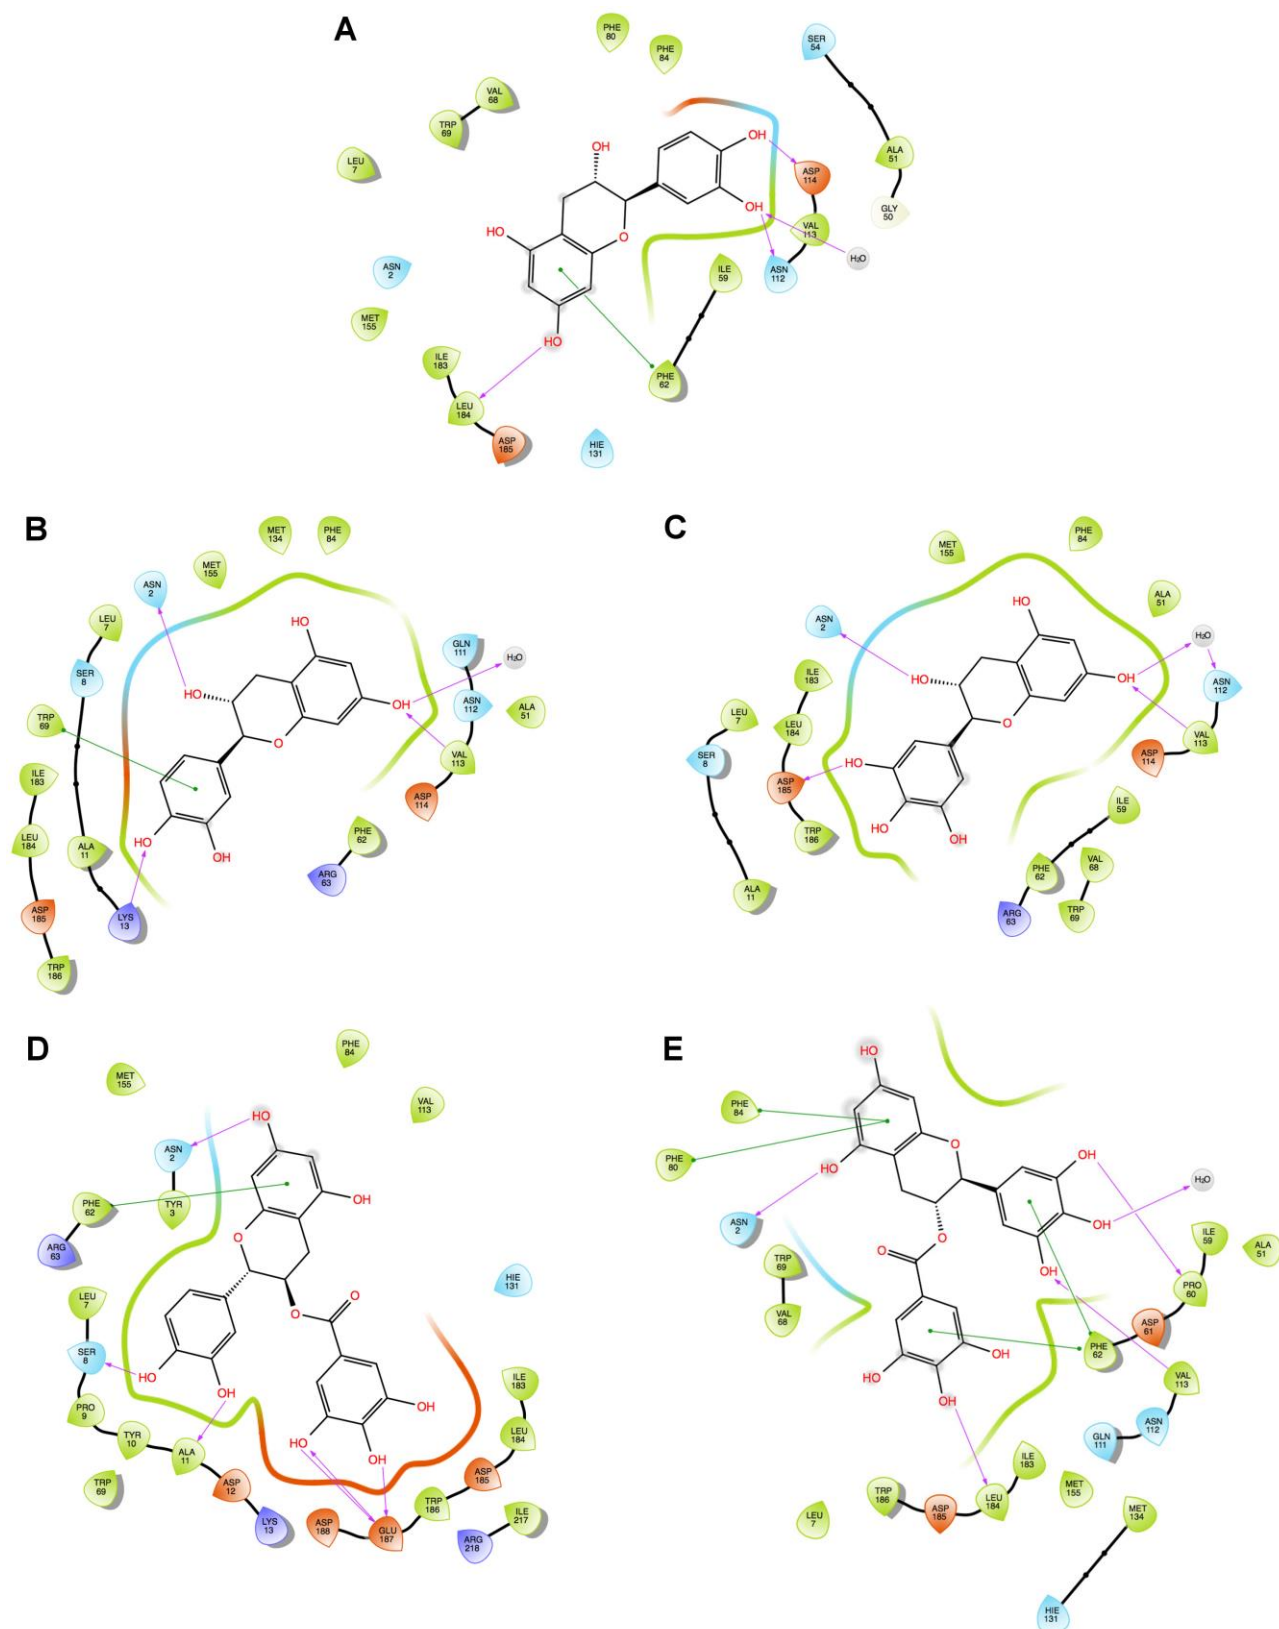

**Figure S11.** Docking poses of catechins at the inhibitor binding site: compounds **1** (A), **2** (B), **3** (C), **4** (D) and **5** (E). Purple arrows indicate hydrogen bonding, green lines indicate  $\pi$ - $\pi$  stacking.

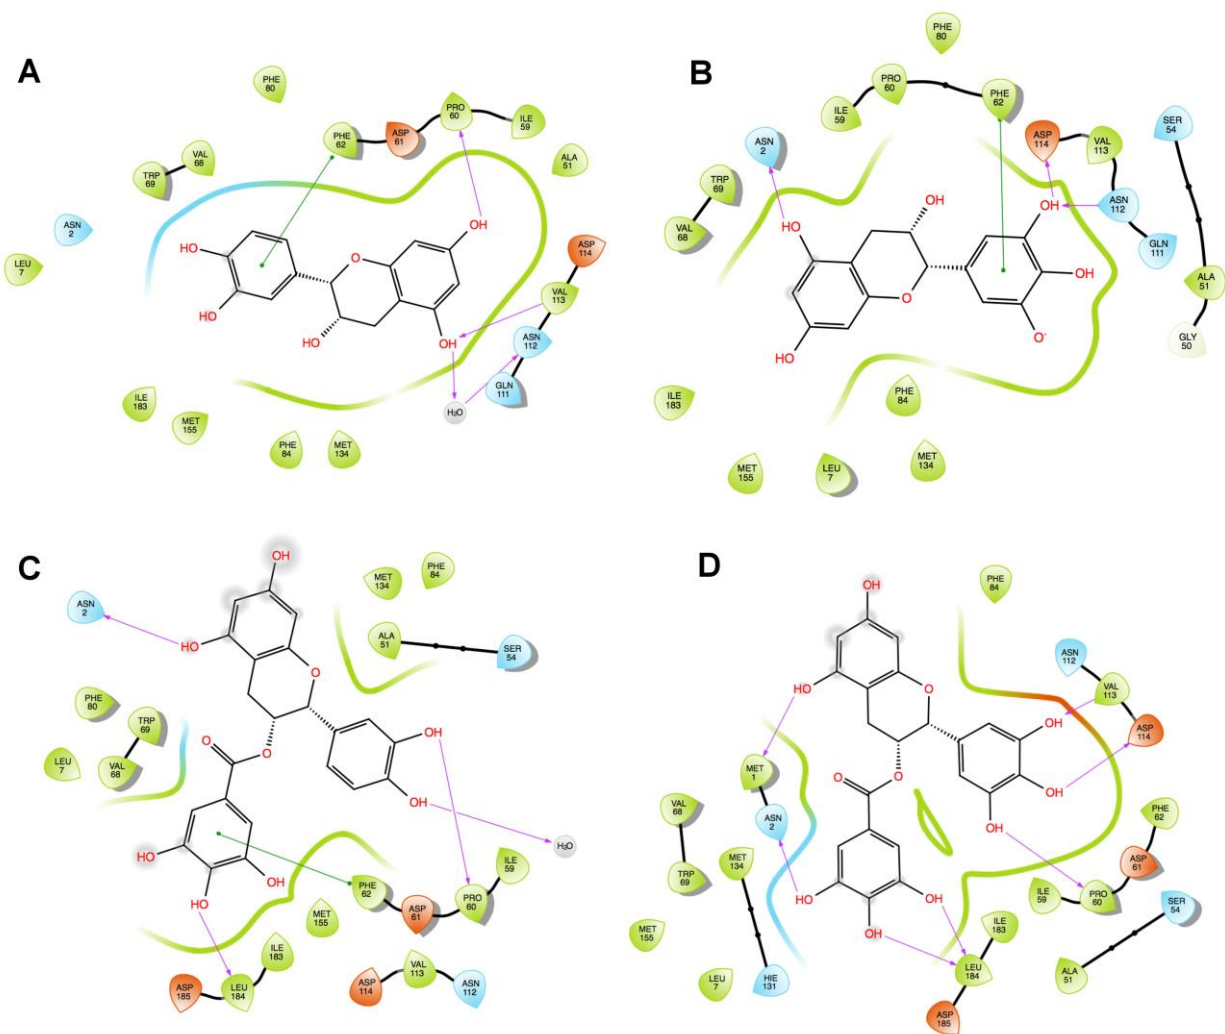

**Figure S12.** Docking poses of epicatechins at the inhibitor binding site: compounds **6** (A), **7** (B), **8** (C) and **9** (D).

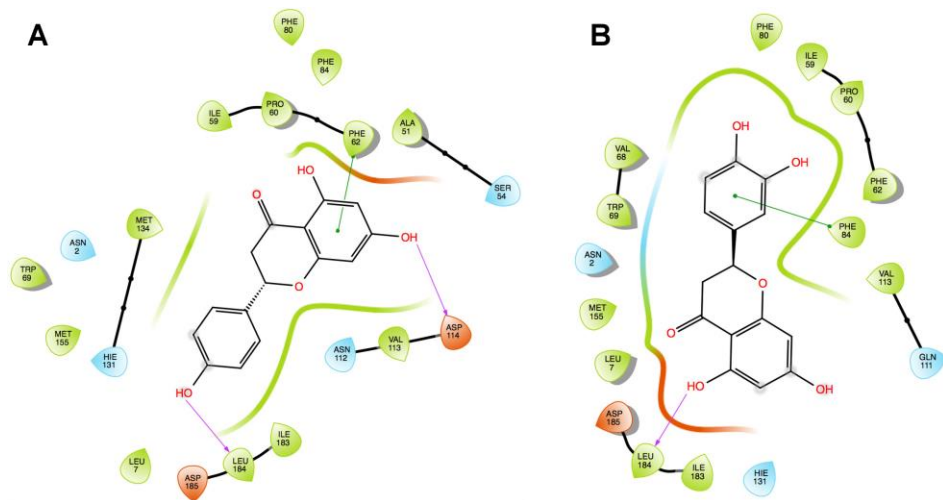

**Figure S13.** Docking poses of flavanones at the inhibitor binding site: compounds **10** (A) and **11** (B). Purple arrows indicate hydrogen bonding, green lines indicate  $\pi$ - $\pi$  stacking.



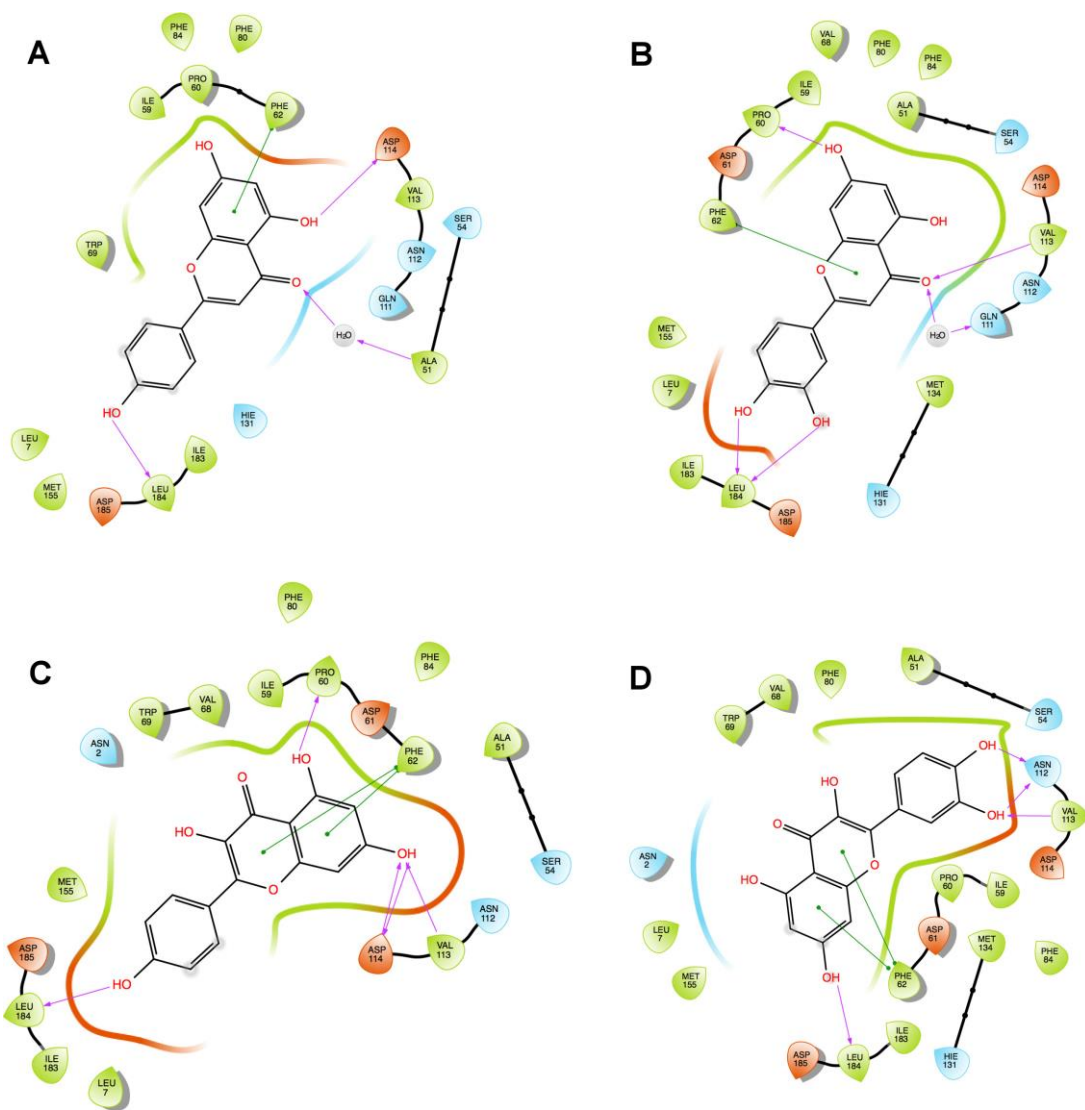

**Figure S14.** Docking poses of flavones at the inhibitor binding site: compounds **12** (A), **13** (B), **14** (C) and **15** (D). Purple arrows indicate hydrogen bonding, green lines indicate  $\pi$ - $\pi$  stacking.

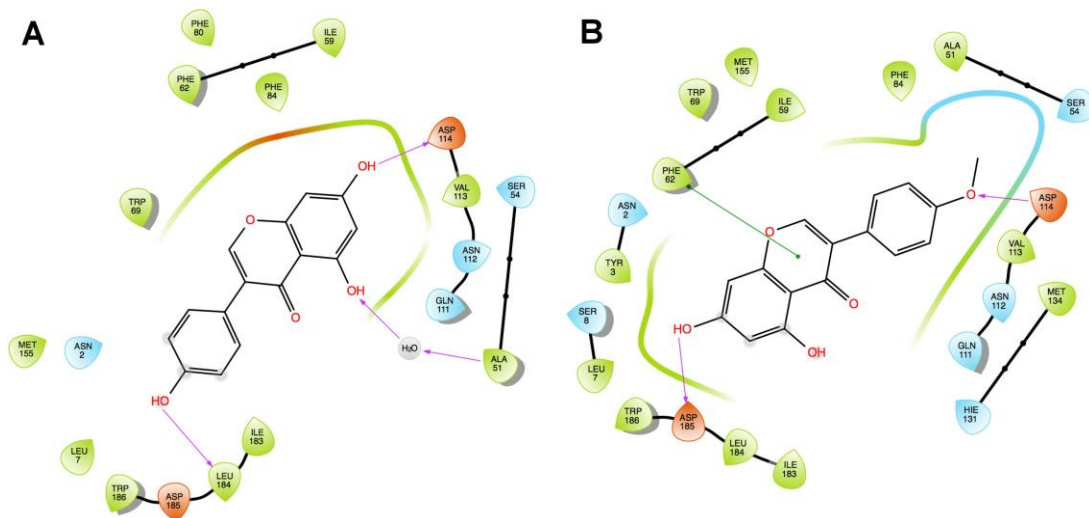

**Figure S15.** Docking poses of isoflavones at the inhibitor binding site: compounds **19** (A) and **20** (B). Purple arrows indicate hydrogen bonding, green lines indicate  $\pi$ - $\pi$  stacking.

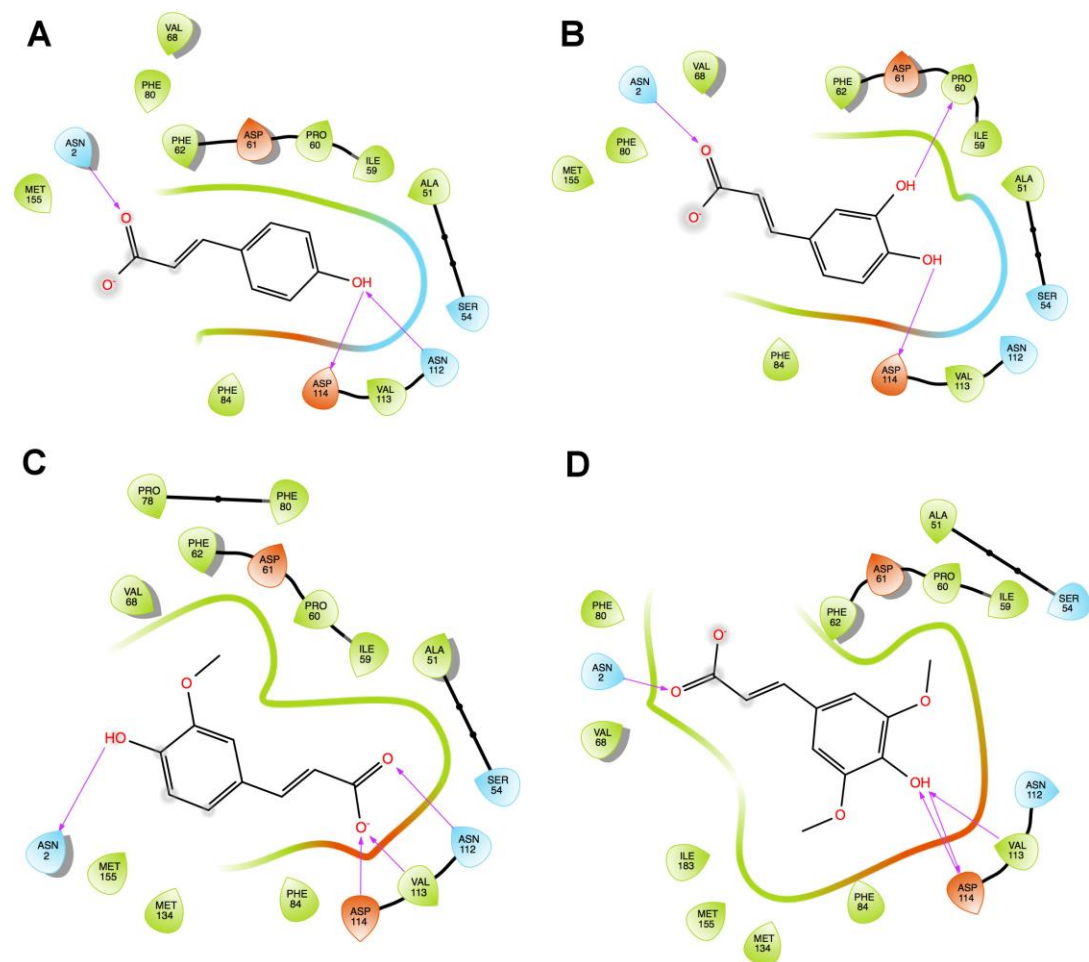

**Figure S16.** Docking poses of inactive phenolic acids at the inhibitor binding site: compounds **24** (A), **25** (B), **26** (C) and **27** (D). Compounds **22** and **23** formed also similar interactions at the inhibitor binding site (data not shown). Purple arrows indicate hydrogen bonding, green lines indicate  $\pi$ - $\pi$  stacking.

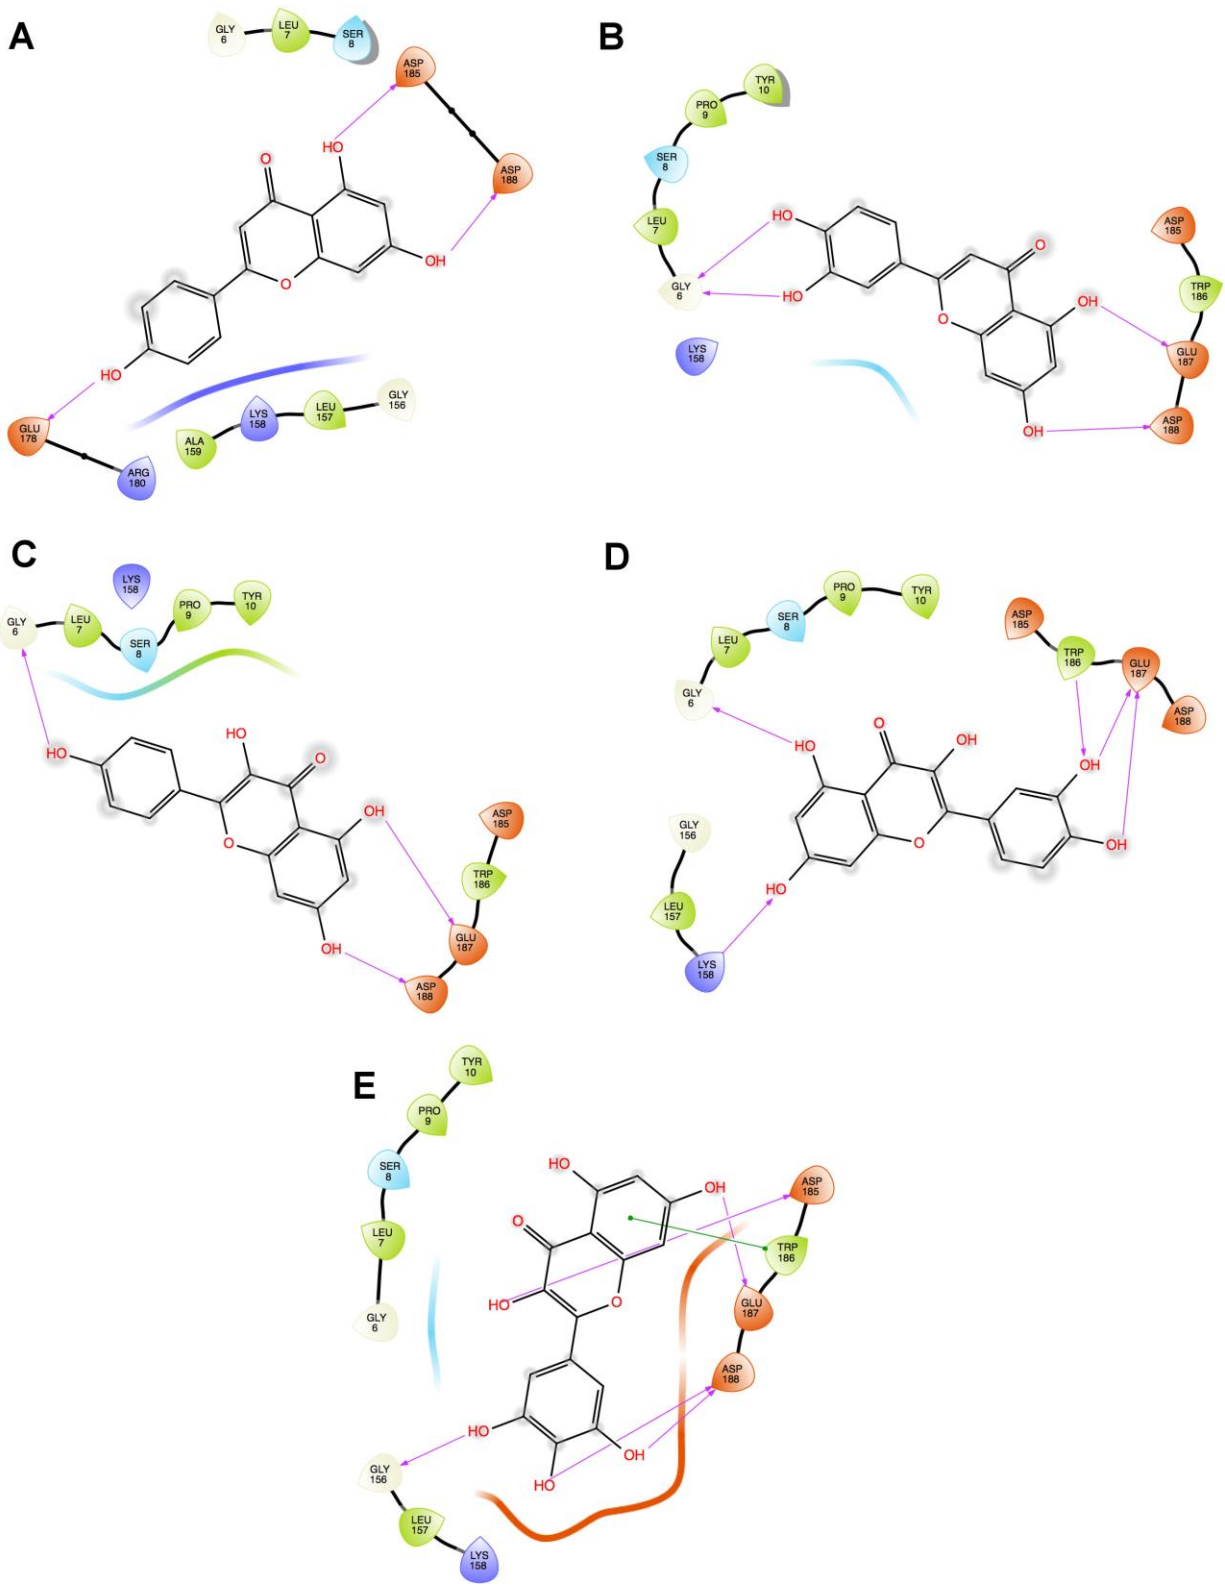

**Figure S17.** Docking poses of flavones at the activator binding site: compounds **12** (A), **13** (B), **14** (C), **15** (D) and **16** (E). Purple arrows indicate hydrogen bonding, green lines indicate  $\pi$ - $\pi$  stacking.

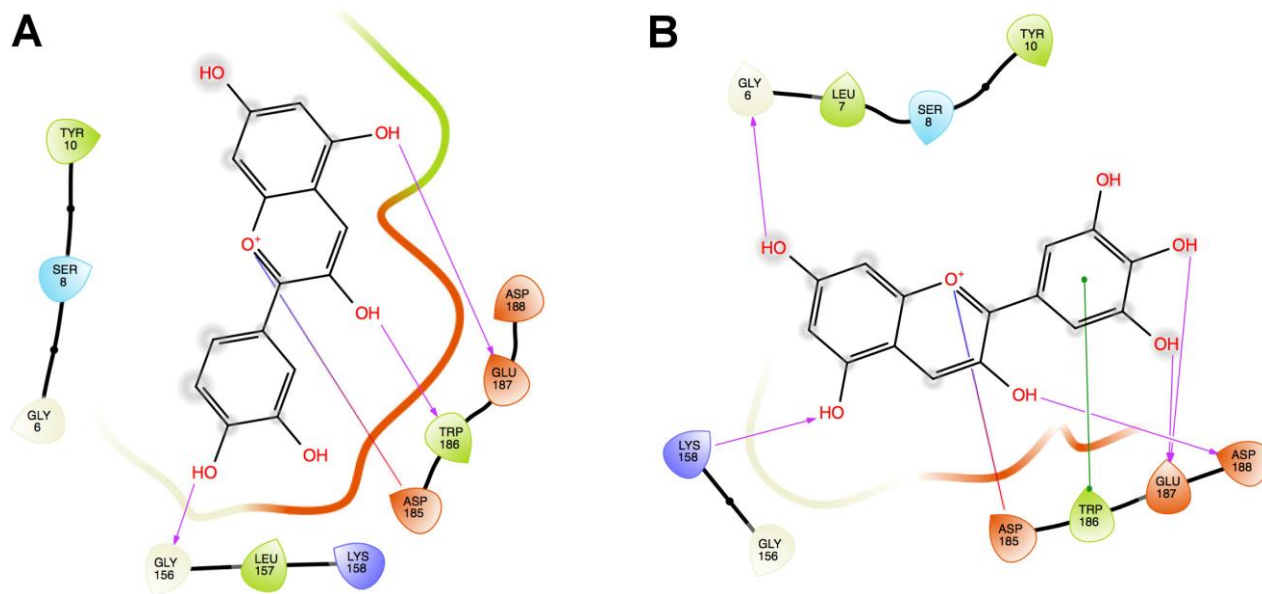

**Figure S18.** Docking poses of anthocyanins at the activator binding site: compounds **17** (A) and **18** (B). Purple arrows indicate hydrogen bonding, green lines indicate  $\pi$ - $\pi$  stacking, blue-red lines indicate salt bridge.

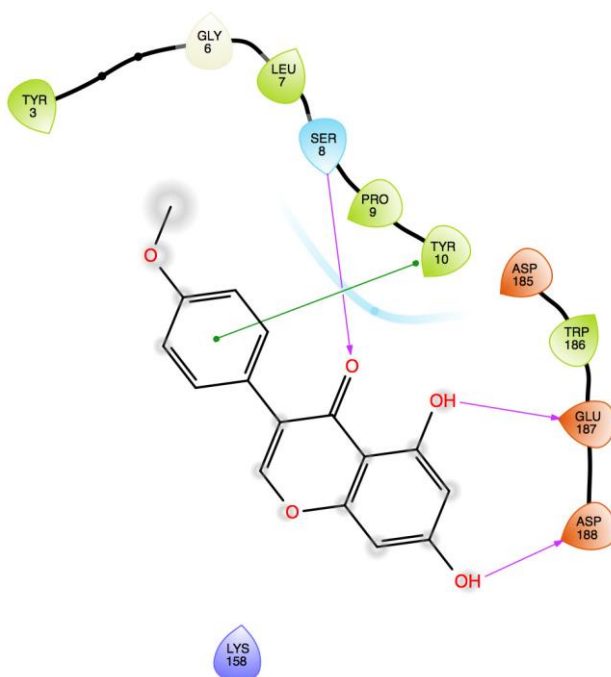

**Figure S19.** Docking pose of isoflavone, compound **20**, at the activator binding site. Purple arrows indicate hydrogen bonding, green lines indicate  $\pi$ - $\pi$  stacking.

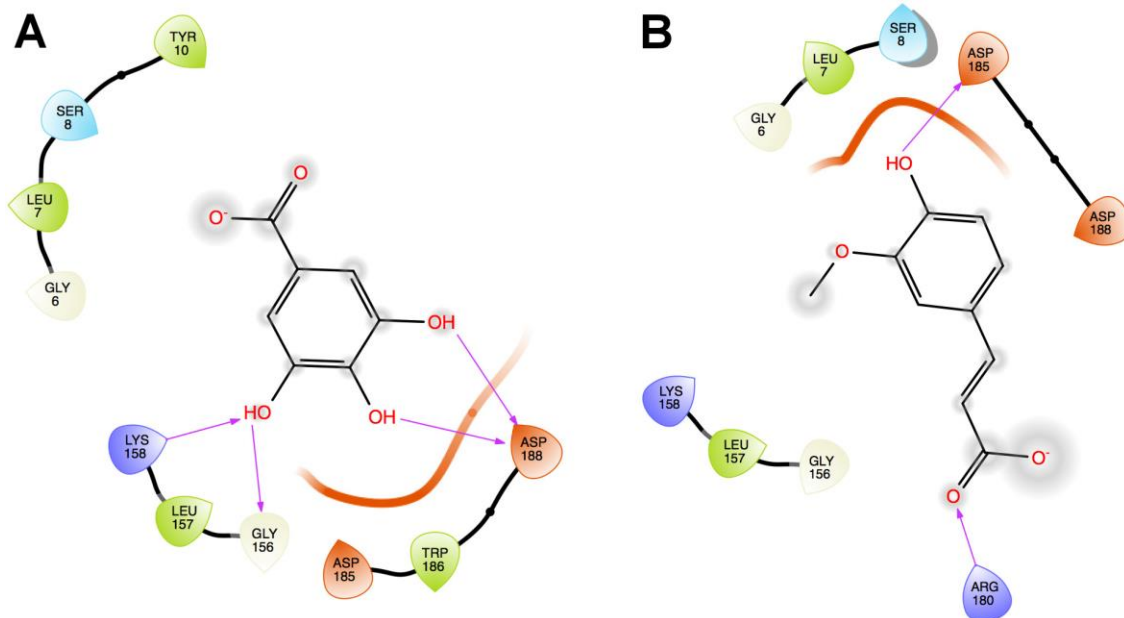

**Figure S20.** Docking poses of phenolic acids at the activator binding site: compounds **22** (A) and **26** (B). Other phenolic acids did not bind to the activator binding site in these docking studies. Purple arrows indicate hydrogen bonding, green lines indicate  $\pi$ - $\pi$  stacking.



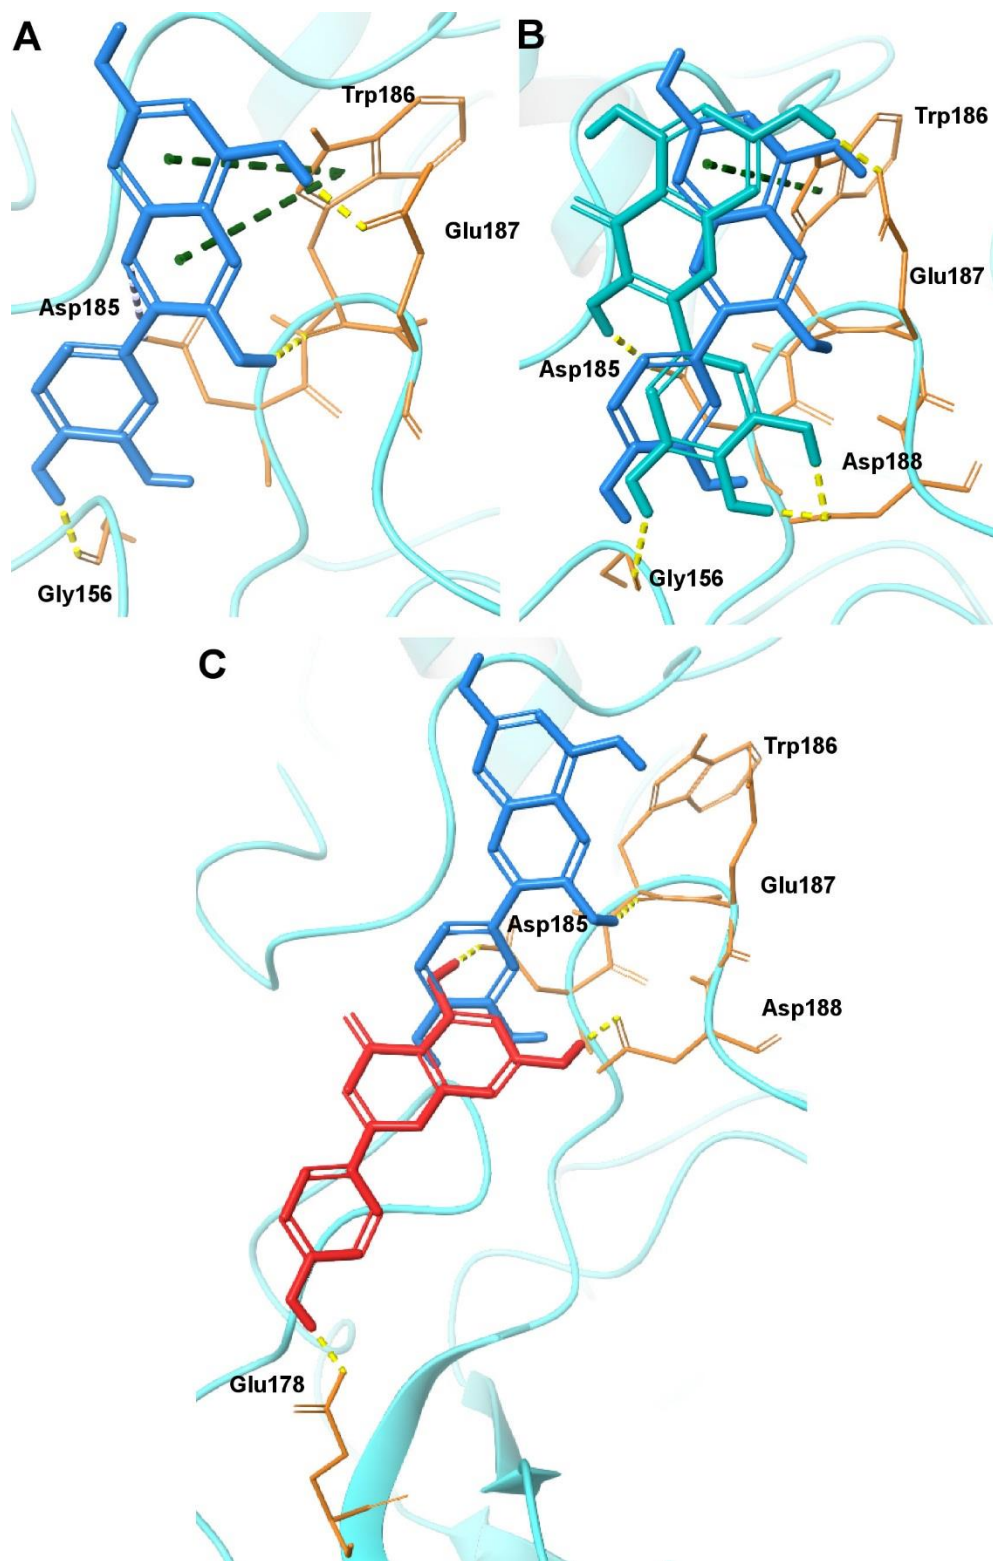

**Figure S21.** The pose and interactions of the most potent activator compound **17** at the SIRT6 putative activator binding site (A). The pose and interactions of potent activator compound **16** (turquoise) (B) and inactive compound **12** (red) (C) compared to the pose of compound **17** (blue). Yellow dashes indicate hydrogen bonding, green dashes indicate  $\pi$ - $\pi$  stacking and light purple dash indicates salt bridge.

**Table S3:** SIFT Protein sequence based predictions. Threshold for intolerance was set to 0.05. Note that the capital letter amino acids shown in Predict Tolerated column are part of the sequence alignment, and the lower-case ones are from prediction. Sequence represented (Seq Rep) values report the fraction that contain one of the basic amino acids. Seq Rep was found to be 1.0 for all the variations.

| Position | Predict Tolerated                      |
|----------|----------------------------------------|
| Gly156   | GLY                                    |
| Asp185   | ASP                                    |
| Trp186   | TRP                                    |
| Glu187   | ASP, GLU                               |
| Asp188   | ALA, glu, LYS, ser, GLY, asn, HIS, ASP |

**Table S4:** Variant impact assessments using sequence and structure based methods. Note that #SEQ denotes the number of sequences and #CLUSTER indicate the number of clusters used in the prediction. HumVar and HumDiv are two classifier models used by PolyPhen-2. HumDiv is preferred for evaluating rare variants and HumVar is more suitable for variants that could result in Mendelian diseases. MEDIAN INFO indicates the median information can be used to measure the diversity of the sequences. Sequence Databases used by PROVEAN, SIFT and PolyPhen-2 are NCBI nr Sep 2012, UniRef90 2011\_08 and UniRef100 2011\_12/PDB-DSSP Snapshot 03-01-2012 respectively.

List of other abbreviations used in the table: PRD: Probably Damaging, POD: Possibly Damaging, APF: Affect Protein Function, BEN: Benign, TOL: Tolerant.

| Variant Information |               | PROVEAN<br>(#SEQ = 108, #CLUSTER = 30) |                          | SIFT<br>(Median Info = 3.01, #SEQ = 49) |                          | Polyphen-2                    |                               |             |
|---------------------|---------------|----------------------------------------|--------------------------|-----------------------------------------|--------------------------|-------------------------------|-------------------------------|-------------|
| POS                 | Bases altered | SCORE                                  | PREDICTION (cutoff=-2.5) | SCORE                                   | PREDICTION (cutoff=0.05) | Prediction HumVar (PPh2_prob) | Prediction HumDiv (PPh2_prob) |             |
| Gly156Al            | a             | 1                                      | -5.267                   | Deleterious                             | 0.05                     | APF                           | POD (0.705)                   | POD (0.908) |
| Asp185Al            | a             | 1                                      | -7.676                   | Deleterious                             | 0.00                     | APF                           | PRD (0.993)                   | PRD (1.000) |
| Asp185Ly            | s             | 2                                      | -6.703                   | Deleterious                             | 0.00                     | APF                           | PRD (0.996)                   | PRD (1.000) |
| Trp186Al            | a             | 2                                      | -13.438                  | Deleterious                             | 0.00                     | APF                           | PRD (0.991)                   | PRD (1.000) |
| Glu187Ly            | s             | 1                                      | -3.825                   | Deleterious                             | 0.01                     | APF                           | POD (0.875)                   | PRD (0.986) |
| Glu187Al            | a             | 1                                      | -5.721                   | Deleterious                             | 0.01                     | APF                           | BEN (0.324)                   | BEN (0.431) |
| Asp188Ly            | s             | 2                                      | -3.494                   | Deleterious                             | 0.04                     | TOL                           | POD (0.612)                   | POD (0.810) |
| Asp188Al            | a             | 1                                      | -4.201                   | Deleterious                             | 0.07                     | TOL                           | BEN (0.375)                   | POD (0.722) |

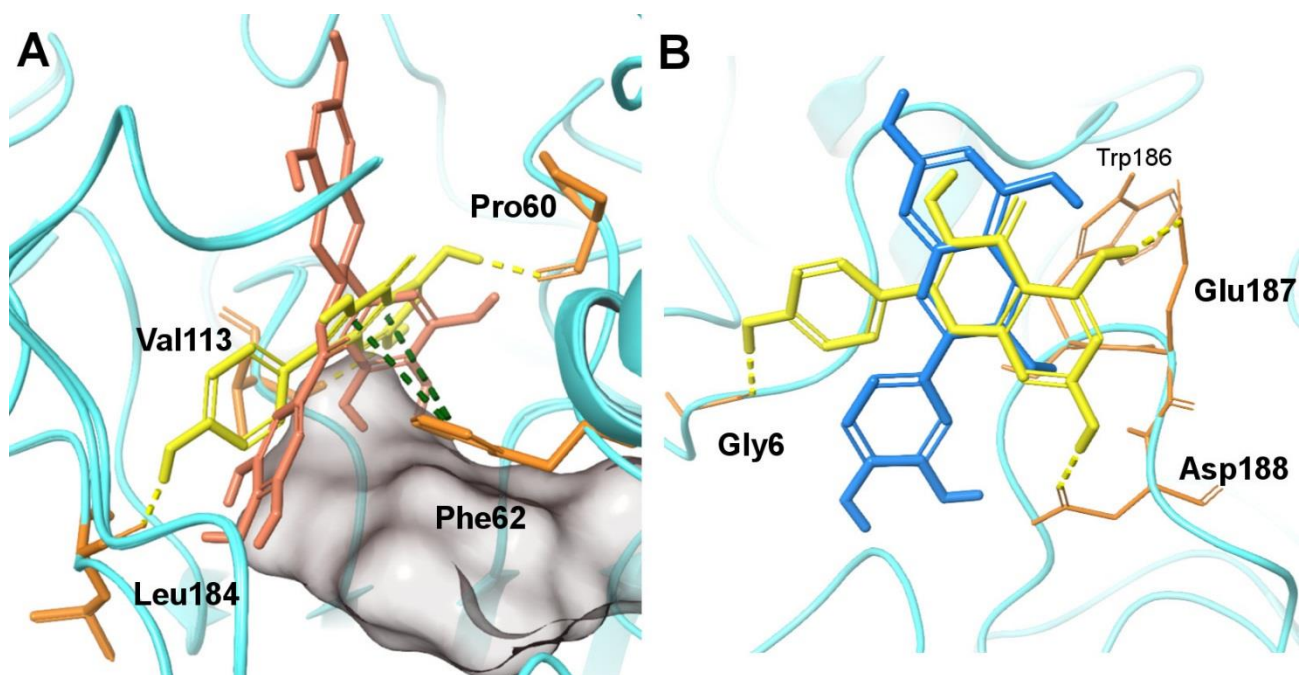

**Figure S22.** Docking poses of compound **14** (yellow) at SIRT6 inhibitor site (A) together with potent inhibitor compound **5** (brown). Docking pose of compound **14** at putative activator site (B) together with potent activator compound **17** (blue). Yellow dashes indicate hydrogen bonding and green dashes indicate  $\pi$ - $\pi$  stacking. Grey area represents NAD<sup>+</sup> binding pocket.
